# Supplementary material for: Pre-test of questions on health-related resource use and expenditure, using behaviour coding and cognitive interviewing techniques
Source: PubMed Central journal article supplement (PMC3470966; doi:10.1186/1472-6963-12-303), 2012-09-06
Supplement: 1472-6963-12-303-S2.pdf [file 1472-6963-12-303-S2.pdf]

Study Participant ID: \_\_\_\_\_

Date: \_\_\_\_\_

Interviewer ID: \_\_\_\_\_

# ***Questionnaire***

## ***on Health and Health Care***

***Thank you very much for participating in this survey!***

Study Participant ID: \_\_\_\_\_

Date: \_\_\_\_\_

Interviewer ID: \_\_\_\_\_

## **Diabetes, Other Illnesses and Health Issues**

### **1. Which type of diabetes do you have?**

Type 1

Type 2 ("Adult Onset Diabetes")

Other

Please specify: \_\_\_\_\_

Don't know

### **2. When were you diagnosed with diabetes?**

\_\_\_\_\_ years ago, or in the year: \_\_\_\_\_

\_\_\_\_\_ months ago (if the diagnosis occurred less than one year ago)

Don't know

### **3. On the following pages you will find a list of various medical conditions. Please indicate which of these conditions you have or have had in the last 12 months. This refers to conditions that were diagnosed by your physician.**

If you check "No" in the first column, please continue directly with the next condition in the line below. If you check "Yes," please indicate whether you receive (medical) treatment for this condition and whether this condition affects you in your activities of daily life (work and leisure time). At the end of the list you may add other conditions that were not listed.

| <b>Medical Condition</b>                                                                                                   | <b>Has this condition been diagnosed by your physician?</b> | <b>Are you receiving (medical) treatment for this condition?</b> | <b>How much does this condition affect you in your daily activities (work and leisure)?</b>                                                                                    |
|----------------------------------------------------------------------------------------------------------------------------|-------------------------------------------------------------|------------------------------------------------------------------|--------------------------------------------------------------------------------------------------------------------------------------------------------------------------------|
| Hypertension (high blood pressure)                                                                                         | <input type="checkbox"/> Yes <input type="checkbox"/> No    | <input type="checkbox"/> Yes <input type="checkbox"/> No         | <input type="checkbox"/> Not at all <input type="checkbox"/> A little <input type="checkbox"/> Moderately <input type="checkbox"/> Severely <input type="checkbox"/> Extremely |
| PAD (peripheral arterial disease: Pain in the legs or calves during walking, forcing you to stop so that the pain lessens) |                                                             |                                                                  |                                                                                                                                                                                |
| Cardiac circulatory disorders (angina pectoris)                                                                            |                                                             |                                                                  |                                                                                                                                                                                |
| Heart attack                                                                                                               |                                                             |                                                                  |                                                                                                                                                                                |
| Cardiac insufficiency                                                                                                      |                                                             |                                                                  |                                                                                                                                                                                |
| Circulatory disorders of the brain                                                                                         |                                                             |                                                                  |                                                                                                                                                                                |
| Stroke                                                                                                                     |                                                             |                                                                  |                                                                                                                                                                                |
| TIA (transient ischemic attack of the brain, with stroke like symptoms)                                                    |                                                             |                                                                  |                                                                                                                                                                                |
| Eye disorders (e.g. damage at the back of the eye, cataracts)                                                              |                                                             |                                                                  |                                                                                                                                                                                |
| Disorders of the leg or foot nerves (e.g. sensation of burning, tingling, numbness)                                        |                                                             |                                                                  |                                                                                                                                                                                |

| Medical Condition                                                     | Has this condition been diagnosed by your physician? | Are you receiving (medical) treatment for this condition? | How much does this condition affect you in your daily activities (work and leisure)? |
|-----------------------------------------------------------------------|------------------------------------------------------|-----------------------------------------------------------|--------------------------------------------------------------------------------------|
| Inflammation, ulcers or wounds on the feet that heal poorly           |                                                      |                                                           |                                                                                      |
| Amputation of the feet or legs                                        |                                                      |                                                           |                                                                                      |
| Kidney disease (e.g. proteinuria)                                     |                                                      |                                                           |                                                                                      |
| Renal dialysis                                                        |                                                      |                                                           |                                                                                      |
| Cancer (malignant tumor)                                              |                                                      |                                                           |                                                                                      |
| Thyroid disorder                                                      |                                                      |                                                           |                                                                                      |
| Gout                                                                  |                                                      |                                                           |                                                                                      |
| Chronic (long lasting) back pain                                      |                                                      |                                                           |                                                                                      |
| Inflammatory disorders of the joints or spine (e.g. arthritis)        |                                                      |                                                           |                                                                                      |
| Other disorders of the joints or spine                                |                                                      |                                                           |                                                                                      |
| Stomach or duodenal ulcers or chronic gastritis                       |                                                      |                                                           |                                                                                      |
| Inflammatory bowel disease (e.g. ulcerative colitis, Crohn's disease) |                                                      |                                                           |                                                                                      |
| Other bowel disease                                                   |                                                      |                                                           |                                                                                      |

| Medical Condition                                                  | Has this condition been diagnosed by your physician? | Are you receiving (medical) treatment for this condition? | How much does this condition affect you in your daily activities (work and leisure)? |
|--------------------------------------------------------------------|------------------------------------------------------|-----------------------------------------------------------|--------------------------------------------------------------------------------------|
| Gall stones                                                        |                                                      |                                                           |                                                                                      |
| Frequent urinary tract infections (bladder infection)              |                                                      |                                                           |                                                                                      |
| Chronic inflammation of the liver (hepatitis)                      |                                                      |                                                           |                                                                                      |
| Allergy or allergies, hay fever                                    |                                                      |                                                           |                                                                                      |
| Bronchial asthma                                                   |                                                      |                                                           |                                                                                      |
| Chronic bronchitis or chronic obstructive pulmonary disease (COPD) |                                                      |                                                           |                                                                                      |
| Anemia                                                             |                                                      |                                                           |                                                                                      |
| Chronic skin disorders (e.g. neurodermatitis, psoriasis)           |                                                      |                                                           |                                                                                      |
| Migraine                                                           |                                                      |                                                           |                                                                                      |
| Epilepsy                                                           |                                                      |                                                           |                                                                                      |
| Parkinson's Disease                                                |                                                      |                                                           |                                                                                      |
| Depression                                                         |                                                      |                                                           |                                                                                      |
| Other medical condition, please specify:<br>_____                  |                                                      |                                                           |                                                                                      |
| Other disorder, please specify:<br>_____                           |                                                      |                                                           |                                                                                      |

**4. In addition to the above medical conditions you may possibly have other health issues. In the following list, please mark which of the health issues you have or have had in the last 12 months.**

If you check “No” in the first column, please continue directly with the next health issue in the line below. If you check “Yes,” please indicate whether you receive (medical) treatment for this health issue and whether this issue affects you in your activities of daily life (work and leisure time). At the end of the list you may add other health issues that were not listed.

| Health issue                                                        | Do you have this health issue?                           | Are you receiving (medical) treatment for this health issue? | How much does this health issue affect you in your daily activities (work and leisure)?                                                                                        |
|---------------------------------------------------------------------|----------------------------------------------------------|--------------------------------------------------------------|--------------------------------------------------------------------------------------------------------------------------------------------------------------------------------|
| Gastrointestinal issues (e.g. frequent abdominal pain, indigestion) | <input type="checkbox"/> Yes <input type="checkbox"/> No | <input type="checkbox"/> Yes <input type="checkbox"/> No     | <input type="checkbox"/> Not at all <input type="checkbox"/> A little <input type="checkbox"/> Moderately <input type="checkbox"/> Severely <input type="checkbox"/> Extremely |
| Joint pain                                                          |                                                          |                                                              |                                                                                                                                                                                |
| Headache                                                            |                                                          |                                                              |                                                                                                                                                                                |
| Heart or chest pains                                                |                                                          |                                                              |                                                                                                                                                                                |
| Chronic (long lasting) cough                                        |                                                          |                                                              |                                                                                                                                                                                |
| Difficulties breathing, breathlessness                              |                                                          |                                                              |                                                                                                                                                                                |
| Sleep disorder                                                      |                                                          |                                                              |                                                                                                                                                                                |
| Dizziness                                                           |                                                          |                                                              |                                                                                                                                                                                |
| Other pain or health issue, please specify:<br>_____                |                                                          |                                                              |                                                                                                                                                                                |

Study Participant ID: \_\_\_\_\_

**5. Have you had surgery in the last 12 months? This refers to surgeries such as gall bladder removal, insertion of an artificial hip joint, heart surgery, or gynecological surgery.**

No             Yes

**If “Yes,” please provide a short description of the type of surgery that was performed:**

---

---

---

**6. In the last six months, have you had an injury caused by an accident at home or close to home, or caused by sports, by an accident at work, or a traffic accident?**

No             Yes

if “Yes”

→ Did you have to receive medical treatment for it?     Yes     No

→ Did you have a bone fracture?                             Yes     No

**7. Do you have a disability that is recognized by the social services administration office?**

No             Yes

if “Yes”

→ Which level of severe disability do you have? \_\_\_\_\_ %

Study Participant ID: \_\_\_\_\_

**General Medical Care**

**8. In the last 6 months, have you seen any of the following physicians? This refers to OUTPATIENT contacts to these doctors or their office personnel (except for treatment in the hospital). Please also consider physician visits to obtain prescriptions or to get referrals and sick leave authorizations.**

| Doctor's medical specialty                                       | Visited       | Number of contacts <u>in the last 6 months</u> |
|------------------------------------------------------------------|---------------|------------------------------------------------|
| Primary physician                                                | _  No  _  Yes | _____ times                                    |
| Specialist in internal medicine*                                 |               |                                                |
| Diabetologist *                                                  |               |                                                |
| Cardiologist (physician for heart diseases)                      |               |                                                |
| Nephrologist (physician for kidney diseases)                     |               |                                                |
| Urologist                                                        |               |                                                |
| Gynecologist                                                     |               |                                                |
| Orthopedic physician                                             |               |                                                |
| Vascular surgeon                                                 |               |                                                |
| Radiologist                                                      |               |                                                |
| Ear, nose, throat specialist                                     |               |                                                |
| Ophthalmologist                                                  |               |                                                |
| Dermatologist                                                    |               |                                                |
| Neurologist                                                      |               |                                                |
| Specialist for psychosomatic disorders (not for psychotherapy)** |               |                                                |
| Psychiatrist (not for psychotherapy)**                           |               |                                                |
| Other physician ( <i>please specify</i> ):                       |               |                                                |
| Other physician ( <i>please specify</i> ):                       |               |                                                |

\* If your diabetologist or specialist in internal medicine is you primary physician, please mention him or her only once.

\*\* Please only indicate contacts that occurred for something other than psychotherapy. Questions on psychotherapy follow below.



Study Participant ID: \_\_\_\_\_

**9. Have you had to ask for a house call in the last 6 months?**

Yes, \_\_\_\_\_ times                       No

**10. In the last 6 months, have you received OUTPATIENT treatment in a hospital (except for emergency treatment and overnight hospital stays)?**

Yes, \_\_\_\_\_ times                       No

**If “Yes,” please provide a short description of what type of treatment you received:**

---

---

---

**11. In the last 6 months, have you visited the emergency room or a medical emergency service or something similar due to an emergency (except for overnight hospital stays)?**

Yes, \_\_\_\_\_ times                       No

**If “Yes,” please provide a short description of what type of treatment you received:**

---

---

---

Study Participant ID: \_\_\_\_\_

**12. Please provide an estimate of how much time you have spent on your outpatient physician visits in the last six months. This refers to the total time spent for all your doctor visits in the last six months. Please indicate the corresponding time in minutes or hours.**

|                                                                       | Travel time to and from   | Time spent waiting        | Treatment time            |
|-----------------------------------------------------------------------|---------------------------|---------------------------|---------------------------|
| Primary physician                                                     | ____  minutes or  ____  h | ____  minutes or  ____  h | ____  minutes or  ____  h |
| Internal medicine physician (if he/she is not your primary physician) |                           |                           |                           |
| Diabetologist (if he/she is not your primary physician)               |                           |                           |                           |
| Cardiologist (physician for heart diseases)                           |                           |                           |                           |
| Nephrologist (physician for kidney diseases)                          |                           |                           |                           |
| Urologist                                                             |                           |                           |                           |
| Gynecologist                                                          |                           |                           |                           |
| Orthopedic physician                                                  |                           |                           |                           |
| Vascular surgeon                                                      |                           |                           |                           |
| Radiologist                                                           |                           |                           |                           |
| Ear, nose, throat physician                                           |                           |                           |                           |
| Ophthalmologist                                                       |                           |                           |                           |
| Dermatologist                                                         |                           |                           |                           |
| Neurologist                                                           |                           |                           |                           |
| Specialist for psychosomatic disorders                                |                           |                           |                           |
| Psychiatrist                                                          |                           |                           |                           |
| Other physician:                                                      |                           |                           |                           |
| Other physician:                                                      |                           |                           |                           |
| Outpatient treatment in the hospital                                  |                           |                           |                           |
| Emergency treatments                                                  |                           |                           |                           |

Study Participant ID: \_\_\_\_\_

**13. In the last 6 months, have you had any of the following special medical tests as an OUTPATIENT? Please check all that apply.**

No

Yes, the following:

| Test                                      | Yes                      | How many times: | What was examined: |
|-------------------------------------------|--------------------------|-----------------|--------------------|
| Sonography (ultrasound)                   | <input type="checkbox"/> | _____ times     |                    |
| X-ray                                     | <input type="checkbox"/> | _____ times     |                    |
| Gastroscopy or colonoscopy                | <input type="checkbox"/> | _____ times     |                    |
| Computer tomography (CT)                  | <input type="checkbox"/> | _____ times     |                    |
| MRI                                       | <input type="checkbox"/> | _____ times     |                    |
| ECG                                       | <input type="checkbox"/> | _____ times     |                    |
| Other ( <i>please describe briefly</i> ): | <input type="checkbox"/> | _____ times     |                    |
| Other ( <i>please describe briefly</i> ): | <input type="checkbox"/> | _____ times     |                    |
| Other ( <i>please describe briefly</i> ): | <input type="checkbox"/> | _____ times     |                    |

Study Participant ID: \_\_\_\_\_

**14. In the last 6 months, have you gone to a hospital for INPATIENT treatment?**

No

Yes, as follows:

| Name and location of the institution | Department | Reason for hospitalization or hospital stay | Was surgery performed?                                      | Duration of hospital stay |
|--------------------------------------|------------|---------------------------------------------|-------------------------------------------------------------|---------------------------|
|                                      |            |                                             | <input type="checkbox"/> Yes<br><input type="checkbox"/> No | ___ days or<br>___ weeks  |
|                                      |            |                                             |                                                             |                           |
|                                      |            |                                             |                                                             |                           |
|                                      |            |                                             |                                                             |                           |
|                                      |            |                                             |                                                             |                           |

Study Participant ID: \_\_\_\_\_

**15. In the last 6 months, have you gone to see a psychotherapist?**

No

Yes, as follows:

| <b>Number of contacts</b> | <b>Costs paid by you, in euros*<br/>(total amount)</b> | <b>Total time spent, in minutes or<br/>hours**</b> |
|---------------------------|--------------------------------------------------------|----------------------------------------------------|
| _____ times               | € _____                                                | ____  minutes or  ____  h                          |

\* If you are not able to indicate the exact amount, please provide an estimate.

\*\* If you are not able to indicate the exact amount of time spent, please provide an estimate.

**16. In the last 6 months, have you gone to see a physical therapist, naturopath, or other therapists?**

No

Yes, as follows:

| <b>Therapist<br/>(Specialty)</b>     | <b>Number of<br/>contacts</b> | <b>Services rendered<br/>(please describe briefly)</b> | <b>Costs paid by<br/>you, in euros*<br/>(total amount)</b> | <b>Total time spent,<br/>in minutes or<br/>hours**</b> |
|--------------------------------------|-------------------------------|--------------------------------------------------------|------------------------------------------------------------|--------------------------------------------------------|
| Physical therapist                   | _____ times                   |                                                        | € _____                                                    | ____  minutes or<br> ____  h                           |
| Naturopath                           |                               |                                                        |                                                            |                                                        |
| Other Therapist<br>(please specify): |                               |                                                        |                                                            |                                                        |
| Other Therapist<br>(please specify): |                               |                                                        |                                                            |                                                        |

\* If you are not able to indicate the exact amount, please provide an estimate.

\*\* If you are not able to indicate the exact amount of time spent, please provide an estimate.

Study Participant ID: \_\_\_\_\_

**17. In the last 6 months, have you participated in health improvement measures? This term refers to measures such as courses, training, or counseling relating to nutrition, exercise, stress relief, as well as sports or fitness.**

No

Yes, the following:

| Brief description | Costs paid by you, in euros* (total amount) | Total time spent, in minutes or hours** |
|-------------------|---------------------------------------------|-----------------------------------------|
|                   | € _____                                     | ____  minutes or<br> ____  h            |
|                   |                                             |                                         |
|                   |                                             |                                         |
|                   |                                             |                                         |

\* If you are not able to indicate the exact amount, please provide an estimate.

\*\* If you are not able to indicate the exact amount of time spent, please provide an estimate.

**18. What type of health insurance do you carry?**

statutory

private

statutory with private supplementary insurance

Study Participant ID: \_\_\_\_\_

**19. Are you enrolled in a *Disease Management Program (DMP)*? This term refers to special programs offered to chronically ill patients by health insurance funds via the primary physician/treating physician and for which you would have to register.**

Yes, the following:

DMP for diabetes

other DMP, please specify: \_\_\_\_\_

No

Don't know

### **Diabetes Treatment**

**20. At present, how often do you measure your blood sugar level?**

\_\_\_\_\_ times per day

\_\_\_\_\_ times per week

Not at all

**21. At present (i.e. in the last two to four weeks), how is your diabetes treated?**

***Several answers are possible.***

with diet or exercise

with blood sugar lowering tablets

with insulin

other (e.g. with injections by Byetta or Victoza): \_\_\_\_\_

Study Participant ID: \_\_\_\_\_

*Please only answer questions 22 to 24 if you are treated with insulin.*

**22. How many times per day do you inject insulin?**

Normally \_\_\_\_\_ times per day

**23. Do you inject insulin at a daily amount that was predefined by your physician or have you and your physician agreed upon “flexible therapy,” i.e. the units are determined by you depending on the meal or time of day:**

Insulin amount is predefined

Insulin amount is determined by me according to need

**24. In the last 6 months, have you changed the type of insulin administration (e.g. changed from syringe to pen or pump)?**

No

Yes, from \_\_\_\_\_ to \_\_\_\_\_ approximately since \_\_\_\_\_

**Health, Work and Daily Life**

**25. In the last 6 months, what type of occupation have you had?**

Working fulltime (35 hours or more per week)

Working part-time

Unemployed

Unable to work

Retired or in early retirement

Other type of work: \_\_\_\_\_

**26. In the last 6 months, have you taken sick leave?**

No

Yes, for a total of \_\_\_\_\_ days



Study Participant ID: \_\_\_\_\_

**27. In the last four weeks, were there days during which you were so ill that you could not carry out your normal (work) activities? Please consider all days during which you were unable to go to work due to illness or could not carry out your normal activities, even if your doctor did not give you sick leave authorization. If you do not know the exact number of days, please provide a close estimate.**

No

Yes, \_\_\_\_\_ days

**28. In the last four weeks, due to your health, have you had to accept help for chores that you normally carry out yourself (e.g. to do housework or run errands)?**

No

Yes, the following:

| Type of help                                | Total time spent, in hours* | Costs paid by you** (total amount) |
|---------------------------------------------|-----------------------------|------------------------------------|
| Help from family, friends or acquaintances  | _____ h                     | € _____                            |
| Home help                                   | _____ h                     | € _____                            |
| Home healthcare associations (e.g. Caritas) | _____ h                     | € _____                            |
| Other, please specify:<br>_____             | _____ h                     | € _____                            |

\* If you are not able to indicate the exact amount of time spent, please provide an estimate.

\*\* If you are not able to indicate the exact amount, please provide an estimate.

**29. In the last 6 months, have you applied for disability pension?**

No     Yes

**If “Yes”, has your application been approved?**

Yes, the decision is valid from \_\_\_ / \_\_\_ / \_\_\_\_\_     No

Study Participant ID: \_\_\_\_\_

**Personal Information**

**30. Your year of birth:** \_\_\_\_\_

**31. Your sex:**            Male             Female

**32. What is your marital status?**

Single           

Married           

Divorced           

Widowed           

**33. Do you live with a spouse or partner?**

Yes           

No           

**34. What is your nationality?**

German           

Other            , please specify: \_\_\_\_\_

**If “other”, how long have you been living in Germany?**

For \_\_\_\_\_ year(s)

**35. What level of pre-college education do you have? Please only indicate your highest level.**

Still a student.....

Left school without a diploma.....

Elementary school, .....

Certificate of middle school or junior high school.....

Advanced technical college entrance qualification (graduation from technical high school, etc.).....

High school diploma or extended comprehensive school (higher education entrance qualification).....

Other school certificate, please specify: \_\_\_\_\_

Study Participant ID: \_\_\_\_\_

**36. What type of occupational certificate do you have?**

*Multiple answers are possible.*

- Company training, but no apprenticeship.....
- Apprenticeship or certificate of vocational school completion .....
- Master, technician, or similar certificate of technical school completion .....
- Advanced technical college degree .....
- University degree .....
- Other occupational certificate, please specify: \_\_\_\_\_
- Still in occupational training (trainee, apprentice, vocational school student) .....
- University student .....
- No occupational certificate .....

**37. What is your current occupation or what was your former occupation?**

\_\_\_\_\_

**38. How many persons permanently live in your household?**

I live by myself.

I do not live alone. In addition to me, there are \_\_\_\_\_ other persons living in my household.

**39. What is the total monthly net income of your household at present? This refers to the total of wages, salaries, income from self-employment, retirement benefits, or pensions. Please also include income from government financial assistance, rental and lease income, housing allowance, child allowance, and any other income.**

**Within which one of the following categories do you fall:**

- |                  |                          |                  |                          |
|------------------|--------------------------|------------------|--------------------------|
| under €1,000     | <input type="checkbox"/> | €3,500 to €3,999 | <input type="checkbox"/> |
| €1,000 to €1,499 | <input type="checkbox"/> | €4,000 to €4,499 | <input type="checkbox"/> |
| €1,500 to €1,999 | <input type="checkbox"/> | €4,500 to €4,999 | <input type="checkbox"/> |
| €2,000 to €2,499 | <input type="checkbox"/> | €5,000 to €5,999 | <input type="checkbox"/> |
| €2,500 to €2,999 | <input type="checkbox"/> | €6,000 to €7,999 | <input type="checkbox"/> |
| €3,000 to €3,499 | <input type="checkbox"/> | €8,000 and over  | <input type="checkbox"/> |

Study Participant ID: \_\_\_\_\_

**Thank you for collaboration.  
Please provide a short evaluation of this questionnaire.**

**Was this questionnaire simple or difficult to complete? Please place a check mark on the scale where appropriate:**

Easy to complete ←————→ Difficult to complete

1       2       3       4       5       6

**What did you think about the length of the questionnaire? Please place a check mark on the scale where appropriate:**

All right ←————→ Much too long

1       2       3       4       5       6

**How long did it take you to complete this questionnaire?**

\_\_\_\_\_ minutes

**Do you have any comments about this questionnaire?**

---

---

---

---

*Thank you!*
