# Supplementary material for: Pre-test of questions on health-related resource use and expenditure, using behaviour coding and cognitive interviewing techniques
Source: BMC Health Serv Res. 2012 Sep 6;12:303. doi: 10.1186/1472-6963-12-303 (PMC3470966; doi:10.1186/1472-6963-12-303)
Supplement: Additional file 1 — Revised questionnaire (German version). [file 1472-6963-12-303-S1.pdf]

Probanden-ID: \_\_\_\_\_

Datum: \_\_\_\_\_

Interviewer-ID: \_\_\_\_\_

# ***Fragebogen***

## ***zu Gesundheit und medizinischer Versorgung***

***Herzlichen Dank, dass Sie an dieser Befragung teilnehmen!***

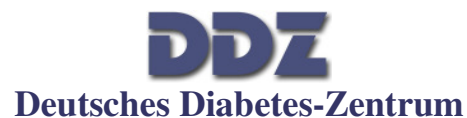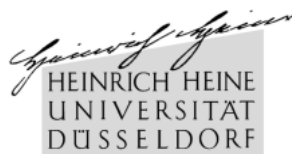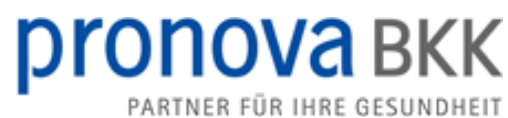

Probanden-ID: \_\_\_\_\_

Datum: \_\_\_\_\_

Interviewer-ID: \_\_\_\_\_

## **Diabetes, andere Erkrankungen und gesundheitliche Probleme**

### **1. Welchen Diabetes-Typ haben Sie?**

Typ-1 ☐

Typ-2 („Altersdiabetes“) ☐

Anderer ☐

und zwar: \_\_\_\_\_

weiß ich nicht ☐

### **2. Wann wurde der Diabetes bei Ihnen diagnostiziert?**

vor \_\_\_\_\_ Jahren oder Jahresangabe: \_\_\_\_\_

vor \_\_\_\_\_ Monaten (wenn Diagnose weniger als 1 Jahr zurückliegt)

weiß ich nicht ☐

### **3. Auf den folgenden Seiten finden Sie eine Auflistung verschiedener Erkrankungen. Bitte geben Sie an, welche dieser Erkrankungen Sie haben bzw. in den letzten 12 Monaten hatten. Gemeint sind Erkrankungen, die Ihre Ärztin/ Ihr Arzt bei Ihnen festgestellt hat.**

Falls Sie in der ersten Spalte „Nein“ ankreuzen, fahren Sie bitte direkt mit der nächsten Erkrankung in der darunterliegenden Zeile fort. Falls Sie „Ja“ ankreuzen, geben Sie bitte an, ob Sie sich aufgrund dieser Erkrankung in (ärztlicher) Behandlung befinden und ob diese Erkrankung Sie in der Ausübung Ihrer täglichen Aktivitäten (Arbeit bzw. Freizeit) beeinträchtigt. Am Ende der Liste haben Sie die Möglichkeit, weitere Erkrankungen zu ergänzen, die bislang nicht aufgeführt wurden.

| <b>Erkrankung</b>                                                                                                                                                                       | <b>Ist die Erkrankung von Ihrer Ärztin/ Ihrem Arzt festgestellt worden?</b> | <b>Befinden Sie sich deshalb in (ärztlicher) Behandlung?</b> | <b>Wie stark beeinträchtigt Sie diese Erkrankung in der Ausübung Ihrer täglichen Aktivitäten (Arbeit bzw. Freizeit)?</b>                                                      |
|-----------------------------------------------------------------------------------------------------------------------------------------------------------------------------------------|-----------------------------------------------------------------------------|--------------------------------------------------------------|-------------------------------------------------------------------------------------------------------------------------------------------------------------------------------|
| Hypertonie (Bluthochdruck)                                                                                                                                                              | <input type="checkbox"/> Ja <input type="checkbox"/> Nein                   | <input type="checkbox"/> Ja <input type="checkbox"/> Nein    | <input type="checkbox"/> Gar nicht <input type="checkbox"/> Ein wenig <input type="checkbox"/> Mittelmäßig <input type="checkbox"/> Stark <input type="checkbox"/> Sehr stark |
| Periphere arterielle Verschlusskrankheit<br>(„Schaufensterkrankheit“:<br>Schmerzen in den Beinen oder Waden beim Gehen, weshalb Sie stehen bleiben müssen, damit der Schmerz nachlässt) | <input type="checkbox"/> Ja <input type="checkbox"/> Nein                   | <input type="checkbox"/> Ja <input type="checkbox"/> Nein    | <input type="checkbox"/> Gar nicht <input type="checkbox"/> Ein wenig <input type="checkbox"/> Mittelmäßig <input type="checkbox"/> Stark <input type="checkbox"/> Sehr stark |
| Durchblutungsstörungen am Herzen (Angina pectoris)                                                                                                                                      | <input type="checkbox"/> Ja <input type="checkbox"/> Nein                   | <input type="checkbox"/> Ja <input type="checkbox"/> Nein    | <input type="checkbox"/> Gar nicht <input type="checkbox"/> Ein wenig <input type="checkbox"/> Mittelmäßig <input type="checkbox"/> Stark <input type="checkbox"/> Sehr stark |
| Herzinfarkt                                                                                                                                                                             | <input type="checkbox"/> Ja <input type="checkbox"/> Nein                   | <input type="checkbox"/> Ja <input type="checkbox"/> Nein    | <input type="checkbox"/> Gar nicht <input type="checkbox"/> Ein wenig <input type="checkbox"/> Mittelmäßig <input type="checkbox"/> Stark <input type="checkbox"/> Sehr stark |
| Herzinsuffizienz (Herzschwäche)                                                                                                                                                         | <input type="checkbox"/> Ja <input type="checkbox"/> Nein                   | <input type="checkbox"/> Ja <input type="checkbox"/> Nein    | <input type="checkbox"/> Gar nicht <input type="checkbox"/> Ein wenig <input type="checkbox"/> Mittelmäßig <input type="checkbox"/> Stark <input type="checkbox"/> Sehr stark |
| Durchblutungsstörung des Gehirns                                                                                                                                                        | <input type="checkbox"/> Ja <input type="checkbox"/> Nein                   | <input type="checkbox"/> Ja <input type="checkbox"/> Nein    | <input type="checkbox"/> Gar nicht <input type="checkbox"/> Ein wenig <input type="checkbox"/> Mittelmäßig <input type="checkbox"/> Stark <input type="checkbox"/> Sehr stark |
| Schlaganfall                                                                                                                                                                            | <input type="checkbox"/> Ja <input type="checkbox"/> Nein                   | <input type="checkbox"/> Ja <input type="checkbox"/> Nein    | <input type="checkbox"/> Gar nicht <input type="checkbox"/> Ein wenig <input type="checkbox"/> Mittelmäßig <input type="checkbox"/> Stark <input type="checkbox"/> Sehr stark |
| TIA (vorübergehende Durchblutungsstörung des Gehirns mit schlaganfallähnlichen Symptomen)                                                                                               | <input type="checkbox"/> Ja <input type="checkbox"/> Nein                   | <input type="checkbox"/> Ja <input type="checkbox"/> Nein    | <input type="checkbox"/> Gar nicht <input type="checkbox"/> Ein wenig <input type="checkbox"/> Mittelmäßig <input type="checkbox"/> Stark <input type="checkbox"/> Sehr stark |
| Erkrankungen der Augen (z.B. Schäden am Augenhintergrund, Katarakt)                                                                                                                     | <input type="checkbox"/> Ja <input type="checkbox"/> Nein                   | <input type="checkbox"/> Ja <input type="checkbox"/> Nein    | <input type="checkbox"/> Gar nicht <input type="checkbox"/> Ein wenig <input type="checkbox"/> Mittelmäßig <input type="checkbox"/> Stark <input type="checkbox"/> Sehr stark |
| Erkrankungen der Nerven an den Beinen bzw. Füßen (z.B. Brennen, Kribbeln oder Taubheitsgefühl)                                                                                          | <input type="checkbox"/> Ja <input type="checkbox"/> Nein                   | <input type="checkbox"/> Ja <input type="checkbox"/> Nein    | <input type="checkbox"/> Gar nicht <input type="checkbox"/> Ein wenig <input type="checkbox"/> Mittelmäßig <input type="checkbox"/> Stark <input type="checkbox"/> Sehr stark |

Probanden-ID: \_\_\_\_\_

| Erkrankung                                                                     | Ist die Erkrankung von Ihrer Ärztin/ Ihrem Arzt festgestellt worden? | Befinden Sie sich deshalb in (ärztlicher) Behandlung?     | Wie stark beeinträchtigt Sie diese Erkrankung in der Ausübung Ihrer täglichen Aktivitäten (Arbeit bzw. Freizeit)?                                                             |
|--------------------------------------------------------------------------------|----------------------------------------------------------------------|-----------------------------------------------------------|-------------------------------------------------------------------------------------------------------------------------------------------------------------------------------|
| Entzündungen, Geschwüre oder Wunden an den Füßen, die schlecht heilen          | <input type="checkbox"/> Ja <input type="checkbox"/> Nein            | <input type="checkbox"/> Ja <input type="checkbox"/> Nein | <input type="checkbox"/> Gar nicht <input type="checkbox"/> Ein wenig <input type="checkbox"/> Mittelmäßig <input type="checkbox"/> Stark <input type="checkbox"/> Sehr stark |
| Amputation an Füßen/ Beinen                                                    | <input type="checkbox"/> Ja <input type="checkbox"/> Nein            | <input type="checkbox"/> Ja <input type="checkbox"/> Nein | <input type="checkbox"/> Gar nicht <input type="checkbox"/> Ein wenig <input type="checkbox"/> Mittelmäßig <input type="checkbox"/> Stark <input type="checkbox"/> Sehr stark |
| Erkrankungen der Niere (z.B. Eiweißausscheidung im Urin)                       | <input type="checkbox"/> Ja <input type="checkbox"/> Nein            | <input type="checkbox"/> Ja <input type="checkbox"/> Nein | <input type="checkbox"/> Gar nicht <input type="checkbox"/> Ein wenig <input type="checkbox"/> Mittelmäßig <input type="checkbox"/> Stark <input type="checkbox"/> Sehr stark |
| Dialysepflichtigkeit (Blutwäsche)                                              | <input type="checkbox"/> Ja <input type="checkbox"/> Nein            | <input type="checkbox"/> Ja <input type="checkbox"/> Nein | <input type="checkbox"/> Gar nicht <input type="checkbox"/> Ein wenig <input type="checkbox"/> Mittelmäßig <input type="checkbox"/> Stark <input type="checkbox"/> Sehr stark |
| Krebserkrankung (bösartiger Tumor)                                             | <input type="checkbox"/> Ja <input type="checkbox"/> Nein            | <input type="checkbox"/> Ja <input type="checkbox"/> Nein | <input type="checkbox"/> Gar nicht <input type="checkbox"/> Ein wenig <input type="checkbox"/> Mittelmäßig <input type="checkbox"/> Stark <input type="checkbox"/> Sehr stark |
| Schilddrüsenerkrankung                                                         | <input type="checkbox"/> Ja <input type="checkbox"/> Nein            | <input type="checkbox"/> Ja <input type="checkbox"/> Nein | <input type="checkbox"/> Gar nicht <input type="checkbox"/> Ein wenig <input type="checkbox"/> Mittelmäßig <input type="checkbox"/> Stark <input type="checkbox"/> Sehr stark |
| Gicht                                                                          | <input type="checkbox"/> Ja <input type="checkbox"/> Nein            | <input type="checkbox"/> Ja <input type="checkbox"/> Nein | <input type="checkbox"/> Gar nicht <input type="checkbox"/> Ein wenig <input type="checkbox"/> Mittelmäßig <input type="checkbox"/> Stark <input type="checkbox"/> Sehr stark |
| Chronische (andauernde) Rückenschmerzen                                        | <input type="checkbox"/> Ja <input type="checkbox"/> Nein            | <input type="checkbox"/> Ja <input type="checkbox"/> Nein | <input type="checkbox"/> Gar nicht <input type="checkbox"/> Ein wenig <input type="checkbox"/> Mittelmäßig <input type="checkbox"/> Stark <input type="checkbox"/> Sehr stark |
| Entzündliche Gelenk- oder Wirbelsäulenerkrankung (z.B. Arthritis)              | <input type="checkbox"/> Ja <input type="checkbox"/> Nein            | <input type="checkbox"/> Ja <input type="checkbox"/> Nein | <input type="checkbox"/> Gar nicht <input type="checkbox"/> Ein wenig <input type="checkbox"/> Mittelmäßig <input type="checkbox"/> Stark <input type="checkbox"/> Sehr stark |
| Sonstige Gelenk- oder Wirbelsäulenerkrankung                                   | <input type="checkbox"/> Ja <input type="checkbox"/> Nein            | <input type="checkbox"/> Ja <input type="checkbox"/> Nein | <input type="checkbox"/> Gar nicht <input type="checkbox"/> Ein wenig <input type="checkbox"/> Mittelmäßig <input type="checkbox"/> Stark <input type="checkbox"/> Sehr stark |
| Magen- oder Zwölffingerdarmgeschwür oder chronische Magenschleimhautentzündung | <input type="checkbox"/> Ja <input type="checkbox"/> Nein            | <input type="checkbox"/> Ja <input type="checkbox"/> Nein | <input type="checkbox"/> Gar nicht <input type="checkbox"/> Ein wenig <input type="checkbox"/> Mittelmäßig <input type="checkbox"/> Stark <input type="checkbox"/> Sehr stark |
| Entzündliche Darmerkrankung (z.B. Colitis Ulcerosa, Morbus Crohn)              | <input type="checkbox"/> Ja <input type="checkbox"/> Nein            | <input type="checkbox"/> Ja <input type="checkbox"/> Nein | <input type="checkbox"/> Gar nicht <input type="checkbox"/> Ein wenig <input type="checkbox"/> Mittelmäßig <input type="checkbox"/> Stark <input type="checkbox"/> Sehr stark |
| Sonstige Darmerkrankung                                                        | <input type="checkbox"/> Ja <input type="checkbox"/> Nein            | <input type="checkbox"/> Ja <input type="checkbox"/> Nein | <input type="checkbox"/> Gar nicht <input type="checkbox"/> Ein wenig <input type="checkbox"/> Mittelmäßig <input type="checkbox"/> Stark <input type="checkbox"/> Sehr stark |

Probanden-ID: \_\_\_\_\_

| Erkrankung                                                                  | Ist die Erkrankung von Ihrer Ärztin/ Ihrem Arzt festgestellt worden? | Befinden Sie sich deshalb in (ärztlicher) Behandlung?     | Wie stark beeinträchtigt Sie diese Erkrankung in der Ausübung Ihrer täglichen Aktivitäten (Arbeit bzw. Freizeit)?                                                             |
|-----------------------------------------------------------------------------|----------------------------------------------------------------------|-----------------------------------------------------------|-------------------------------------------------------------------------------------------------------------------------------------------------------------------------------|
| Gallensteine                                                                | <input type="checkbox"/> Ja <input type="checkbox"/> Nein            | <input type="checkbox"/> Ja <input type="checkbox"/> Nein | <input type="checkbox"/> Gar nicht <input type="checkbox"/> Ein wenig <input type="checkbox"/> Mittelmäßig <input type="checkbox"/> Stark <input type="checkbox"/> Sehr stark |
| Häufige Harnwegsinfektionen (Blasenentzündung)                              | <input type="checkbox"/> Ja <input type="checkbox"/> Nein            | <input type="checkbox"/> Ja <input type="checkbox"/> Nein | <input type="checkbox"/> Gar nicht <input type="checkbox"/> Ein wenig <input type="checkbox"/> Mittelmäßig <input type="checkbox"/> Stark <input type="checkbox"/> Sehr stark |
| Chronische Leberentzündung (Hepatitis)                                      | <input type="checkbox"/> Ja <input type="checkbox"/> Nein            | <input type="checkbox"/> Ja <input type="checkbox"/> Nein | <input type="checkbox"/> Gar nicht <input type="checkbox"/> Ein wenig <input type="checkbox"/> Mittelmäßig <input type="checkbox"/> Stark <input type="checkbox"/> Sehr stark |
| Allergie(n), Heuschnupfen                                                   | <input type="checkbox"/> Ja <input type="checkbox"/> Nein            | <input type="checkbox"/> Ja <input type="checkbox"/> Nein | <input type="checkbox"/> Gar nicht <input type="checkbox"/> Ein wenig <input type="checkbox"/> Mittelmäßig <input type="checkbox"/> Stark <input type="checkbox"/> Sehr stark |
| Asthma bronchiale                                                           | <input type="checkbox"/> Ja <input type="checkbox"/> Nein            | <input type="checkbox"/> Ja <input type="checkbox"/> Nein | <input type="checkbox"/> Gar nicht <input type="checkbox"/> Ein wenig <input type="checkbox"/> Mittelmäßig <input type="checkbox"/> Stark <input type="checkbox"/> Sehr stark |
| Chronische Bronchitis oder chronisch obstruktive Lungenerkrankung (COPD)    | <input type="checkbox"/> Ja <input type="checkbox"/> Nein            | <input type="checkbox"/> Ja <input type="checkbox"/> Nein | <input type="checkbox"/> Gar nicht <input type="checkbox"/> Ein wenig <input type="checkbox"/> Mittelmäßig <input type="checkbox"/> Stark <input type="checkbox"/> Sehr stark |
| Blutarmut (Anämie)                                                          | <input type="checkbox"/> Ja <input type="checkbox"/> Nein            | <input type="checkbox"/> Ja <input type="checkbox"/> Nein | <input type="checkbox"/> Gar nicht <input type="checkbox"/> Ein wenig <input type="checkbox"/> Mittelmäßig <input type="checkbox"/> Stark <input type="checkbox"/> Sehr stark |
| Chronische Hautkrankheiten (z.B. Neurodermitis, Schuppenflechte/ Psoriasis) | <input type="checkbox"/> Ja <input type="checkbox"/> Nein            | <input type="checkbox"/> Ja <input type="checkbox"/> Nein | <input type="checkbox"/> Gar nicht <input type="checkbox"/> Ein wenig <input type="checkbox"/> Mittelmäßig <input type="checkbox"/> Stark <input type="checkbox"/> Sehr stark |
| Migräne                                                                     | <input type="checkbox"/> Ja <input type="checkbox"/> Nein            | <input type="checkbox"/> Ja <input type="checkbox"/> Nein | <input type="checkbox"/> Gar nicht <input type="checkbox"/> Ein wenig <input type="checkbox"/> Mittelmäßig <input type="checkbox"/> Stark <input type="checkbox"/> Sehr stark |
| Epilepsie                                                                   | <input type="checkbox"/> Ja <input type="checkbox"/> Nein            | <input type="checkbox"/> Ja <input type="checkbox"/> Nein | <input type="checkbox"/> Gar nicht <input type="checkbox"/> Ein wenig <input type="checkbox"/> Mittelmäßig <input type="checkbox"/> Stark <input type="checkbox"/> Sehr stark |
| Parkinson-Krankheit                                                         | <input type="checkbox"/> Ja <input type="checkbox"/> Nein            | <input type="checkbox"/> Ja <input type="checkbox"/> Nein | <input type="checkbox"/> Gar nicht <input type="checkbox"/> Ein wenig <input type="checkbox"/> Mittelmäßig <input type="checkbox"/> Stark <input type="checkbox"/> Sehr stark |
| Depression                                                                  | <input type="checkbox"/> Ja <input type="checkbox"/> Nein            | <input type="checkbox"/> Ja <input type="checkbox"/> Nein | <input type="checkbox"/> Gar nicht <input type="checkbox"/> Ein wenig <input type="checkbox"/> Mittelmäßig <input type="checkbox"/> Stark <input type="checkbox"/> Sehr stark |
| Sonstige Erkrankung, und zwar:<br>_____                                     | <input type="checkbox"/> Ja <input type="checkbox"/> Nein            | <input type="checkbox"/> Ja <input type="checkbox"/> Nein | <input type="checkbox"/> Gar nicht <input type="checkbox"/> Ein wenig <input type="checkbox"/> Mittelmäßig <input type="checkbox"/> Stark <input type="checkbox"/> Sehr stark |
| Sonstige Erkrankung, und zwar:<br>_____                                     | <input type="checkbox"/> Ja <input type="checkbox"/> Nein            | <input type="checkbox"/> Ja <input type="checkbox"/> Nein | <input type="checkbox"/> Gar nicht <input type="checkbox"/> Ein wenig <input type="checkbox"/> Mittelmäßig <input type="checkbox"/> Stark <input type="checkbox"/> Sehr stark |

**4. Möglicherweise haben Sie neben den oben genannten Erkrankungen weitere Beschwerden oder gesundheitliche Probleme. Bitte markieren Sie in der folgenden Auflistung, welche der genannten Beschwerden oder gesundheitlichen Probleme Sie haben bzw. in den letzten 12 Monaten hatten.**

Falls Sie in der ersten Spalte „Nein“ ankreuzen, fahren Sie bitte direkt mit dem nächsten gesundheitlichen Problem in der darunterliegenden Zeile fort. Falls Sie „Ja“ ankreuzen, geben Sie bitte an, ob Sie sich aufgrund dieses Problems in (ärztlicher) Behandlung befinden und ob dieses Problem Sie in der Ausübung Ihrer täglichen Aktivitäten (Arbeit bzw. Freizeit) beeinträchtigt. Sie haben zusätzlich die Möglichkeit, weitere Beschwerden zu ergänzen, die bislang nicht aufgeführt wurden.

| Gesundheitliches Problem                                             | Haben Sie dieses gesundheitliche Problem?                 | Befinden Sie sich deshalb in (ärztlicher) Behandlung?     | Wie stark beeinträchtigt Sie dieses gesundheitliche Problem in der Ausübung Ihrer täglichen Aktivitäten (Arbeit bzw. Freizeit)?                                               |
|----------------------------------------------------------------------|-----------------------------------------------------------|-----------------------------------------------------------|-------------------------------------------------------------------------------------------------------------------------------------------------------------------------------|
| Magen-Darm Probleme (z.B. häufige Bauchschmerzen, Verdauungsstörung) | <input type="checkbox"/> Ja <input type="checkbox"/> Nein | <input type="checkbox"/> Ja <input type="checkbox"/> Nein | <input type="checkbox"/> Gar nicht <input type="checkbox"/> Ein wenig <input type="checkbox"/> Mittelmäßig <input type="checkbox"/> Stark <input type="checkbox"/> Sehr stark |
| Gelenkschmerzen                                                      | <input type="checkbox"/> Ja <input type="checkbox"/> Nein | <input type="checkbox"/> Ja <input type="checkbox"/> Nein | <input type="checkbox"/> Gar nicht <input type="checkbox"/> Ein wenig <input type="checkbox"/> Mittelmäßig <input type="checkbox"/> Stark <input type="checkbox"/> Sehr stark |
| Kopfschmerzen                                                        | <input type="checkbox"/> Ja <input type="checkbox"/> Nein | <input type="checkbox"/> Ja <input type="checkbox"/> Nein | <input type="checkbox"/> Gar nicht <input type="checkbox"/> Ein wenig <input type="checkbox"/> Mittelmäßig <input type="checkbox"/> Stark <input type="checkbox"/> Sehr stark |
| Herz- oder Brustschmerzen                                            | <input type="checkbox"/> Ja <input type="checkbox"/> Nein | <input type="checkbox"/> Ja <input type="checkbox"/> Nein | <input type="checkbox"/> Gar nicht <input type="checkbox"/> Ein wenig <input type="checkbox"/> Mittelmäßig <input type="checkbox"/> Stark <input type="checkbox"/> Sehr stark |
| Chronischer (lang andauernder) Husten                                | <input type="checkbox"/> Ja <input type="checkbox"/> Nein | <input type="checkbox"/> Ja <input type="checkbox"/> Nein | <input type="checkbox"/> Gar nicht <input type="checkbox"/> Ein wenig <input type="checkbox"/> Mittelmäßig <input type="checkbox"/> Stark <input type="checkbox"/> Sehr stark |
| Schwierigkeiten beim Atmen, Atemnot                                  | <input type="checkbox"/> Ja <input type="checkbox"/> Nein | <input type="checkbox"/> Ja <input type="checkbox"/> Nein | <input type="checkbox"/> Gar nicht <input type="checkbox"/> Ein wenig <input type="checkbox"/> Mittelmäßig <input type="checkbox"/> Stark <input type="checkbox"/> Sehr stark |
| Schlafstörung                                                        | <input type="checkbox"/> Ja <input type="checkbox"/> Nein | <input type="checkbox"/> Ja <input type="checkbox"/> Nein | <input type="checkbox"/> Gar nicht <input type="checkbox"/> Ein wenig <input type="checkbox"/> Mittelmäßig <input type="checkbox"/> Stark <input type="checkbox"/> Sehr stark |
| Schwindelgefühl                                                      | <input type="checkbox"/> Ja <input type="checkbox"/> Nein | <input type="checkbox"/> Ja <input type="checkbox"/> Nein | <input type="checkbox"/> Gar nicht <input type="checkbox"/> Ein wenig <input type="checkbox"/> Mittelmäßig <input type="checkbox"/> Stark <input type="checkbox"/> Sehr stark |
| Sonstige Schmerzen oder Beschwerden, und zwar:<br>_____              | <input type="checkbox"/> Ja <input type="checkbox"/> Nein | <input type="checkbox"/> Ja <input type="checkbox"/> Nein | <input type="checkbox"/> Gar nicht <input type="checkbox"/> Ein wenig <input type="checkbox"/> Mittelmäßig <input type="checkbox"/> Stark <input type="checkbox"/> Sehr stark |

Probanden-ID: \_\_\_\_\_

5. Sind Sie in den letzten 12 Monaten operiert worden? Gemeint ist z.B. die Entfernung der Gallenblase, der Einsatz eines künstlichen Hüftgelenks, eine Operation am Herzen, oder eine gynäkologische Operation.

☐ Nein      ☐ Ja

Falls „ja“ beschreiben Sie bitte kurz, welche Operationen durchgeführt wurden:

---

---

---

6. Haben Sie in den letzten 6 Monaten eine Verletzung erlitten, die durch einen Unfall zuhause oder im Umfeld Ihres Hauses, durch sportliche Aktivität, durch einen Arbeitsunfall oder im Straßenverkehr verursacht wurde?

☐ Nein      ☐ Ja

    falls „Ja“

    → Mussten Sie deshalb ärztlich behandelt werden?      ☐ Ja      ☐ Nein

    → Hatten Sie einen Knochenbruch?      ☐ Ja      ☐ Nein

7. Besteht bei Ihnen eine Behinderung, die vom Versorgungsamt anerkannt ist?

☐ Nein      ☐ Ja

    falls „Ja“

    → Welchen Grad der Schwerbehinderung haben Sie? \_\_\_\_\_%

Probanden-ID: \_\_\_\_\_

### **Allgemeine medizinische Versorgung**

**8. Waren Sie in den letzten 6 Monaten bei den folgenden Ärzten? Gemeint sind AMBULANTE Kontakte zu den Ärzten oder deren Praxispersonal (ausgenommen Behandlungen im Krankenhaus). Bitte berücksichtigen Sie hier auch die Praxisbesuche zur Abholung von Rezepten oder Überweisungen und zur Krankschreibung!**

| <b>Fachrichtung des Arztes</b>                  | <b>In Anspruch genommen</b>                               | <b>Anzahl der Kontakte <u>in den letzten 6 Monaten</u></b> |
|-------------------------------------------------|-----------------------------------------------------------|------------------------------------------------------------|
| Hausarzt                                        | <input type="checkbox"/> Nein <input type="checkbox"/> Ja | _____ mal                                                  |
| Internist (falls nicht Ihr Hausarzt)*           | <input type="checkbox"/> Nein <input type="checkbox"/> Ja | _____ mal                                                  |
| Diabetologe (falls nicht Ihr Hausarzt)*         | <input type="checkbox"/> Nein <input type="checkbox"/> Ja | _____ mal                                                  |
| Kardiologe (Arzt für Herzkrankheiten)           | <input type="checkbox"/> Nein <input type="checkbox"/> Ja | _____ mal                                                  |
| Nephrologe (Arzt für Nierenkrankheiten)         | <input type="checkbox"/> Nein <input type="checkbox"/> Ja | _____ mal                                                  |
| Urologe                                         | <input type="checkbox"/> Nein <input type="checkbox"/> Ja | _____ mal                                                  |
| Gynäkologe                                      | <input type="checkbox"/> Nein <input type="checkbox"/> Ja | _____ mal                                                  |
| Orthopäde                                       | <input type="checkbox"/> Nein <input type="checkbox"/> Ja | _____ mal                                                  |
| Gefäßchirurg                                    | <input type="checkbox"/> Nein <input type="checkbox"/> Ja | _____ mal                                                  |
| Radiologe (Röntgenarzt)                         | <input type="checkbox"/> Nein <input type="checkbox"/> Ja | _____ mal                                                  |
| Hals-Nasen-Ohrenarzt                            | <input type="checkbox"/> Nein <input type="checkbox"/> Ja | _____ mal                                                  |
| Augenarzt                                       | <input type="checkbox"/> Nein <input type="checkbox"/> Ja | _____ mal                                                  |
| Dermatologe (Hautarzt)                          | <input type="checkbox"/> Nein <input type="checkbox"/> Ja | _____ mal                                                  |
| Neurologe                                       | <input type="checkbox"/> Nein <input type="checkbox"/> Ja | _____ mal                                                  |
| Arzt für Psychosomatik (keine Psychotherapie)** | <input type="checkbox"/> Nein <input type="checkbox"/> Ja | _____ mal                                                  |
| Psychiater (keine Psychotherapie)**             | <input type="checkbox"/> Nein <input type="checkbox"/> Ja | _____ mal                                                  |
| Sonstiger Arzt ( <i>bitte benennen</i> ):       | <input type="checkbox"/> Nein <input type="checkbox"/> Ja | _____ mal                                                  |
| Sonstiger Arzt ( <i>bitte benennen</i> ):       | <input type="checkbox"/> Nein <input type="checkbox"/> Ja | _____ mal                                                  |

\*Falls Ihr Diabetologe bzw. Ihr Internist zugleich ihr Hausarzt ist, machen Sie bitte entsprechende Angaben nur einmal.

\*\*Bitte nur Kontakte angeben, die einen anderen Anlass als eine Psychotherapie hatten. Psychotherapie wird unten erfragt.

Probanden-ID: \_\_\_\_\_

**9. Haben Sie in den letzten 6 Monaten einen Hausbesuch bestellen müssen?**

☐ Ja, nämlich \_\_\_\_\_ mal

☐ Nein

**10. Wurden Sie in den letzten 6 Monaten in einem Krankenhaus AMBULANT behandelt (ausgenommen Notfallbehandlungen und Übernachtungen im Krankenhaus)?**

☐ Ja, nämlich \_\_\_\_\_ mal

☐ Nein

**Falls „ja“ beschreiben Sie bitte kurz, was dort gemacht wurde:**

---

---

---

**11. Haben Sie in den letzten 6 Monaten eine Krankenhaus-Ambulanz oder ärztlichen Notdienst/Notarzt o.ä. wegen eines Notfalls aufgesucht (ausgenommen Übernachtungen im Krankenhaus)?**

☐ Ja, nämlich \_\_\_\_\_ mal

☐ Nein

**Falls „ja“ beschreiben Sie bitte kurz, was gemacht wurde:**

---

---

---

Probanden-ID: \_\_\_\_\_

**12. Bitte schätzen Sie, wie viel Zeit Sie für Ihre ambulanten Arztbesuche in den letzten 6 Monaten aufgewendet haben. Gemeint ist die Gesamtzeit für alle Ihre Arztbesuche in den letzten 6 Monaten. Machen Sie bitte entsprechende Angaben in Minuten oder Stunden.**

|                                          | An- und Abfahrtzeit    | Wartezeit              | Behandlungszeit        |
|------------------------------------------|------------------------|------------------------|------------------------|
| Hausarzt                                 | _ _  Min. bzw.  _ _  h | _ _  Min. bzw.  _ _  h | _ _  Min. bzw.  _ _  h |
| Internist<br>(wenn nicht Ihr Hausarzt)   | _ _  Min. bzw.  _ _  h | _ _  Min. bzw.  _ _  h | _ _  Min. bzw.  _ _  h |
| Diabetologe<br>(wenn nicht Ihr Hausarzt) | _ _  Min. bzw.  _ _  h | _ _  Min. bzw.  _ _  h | _ _  Min. bzw.  _ _  h |
| Kardiologe (Herzarzt)                    | _ _  Min. bzw.  _ _  h | _ _  Min. bzw.  _ _  h | _ _  Min. bzw.  _ _  h |
| Nephrologe (Nierenarzt)                  | _ _  Min. bzw.  _ _  h | _ _  Min. bzw.  _ _  h | _ _  Min. bzw.  _ _  h |
| Urologe                                  | _ _  Min. bzw.  _ _  h | _ _  Min. bzw.  _ _  h | _ _  Min. bzw.  _ _  h |
| Gynäkologe                               | _ _  Min. bzw.  _ _  h | _ _  Min. bzw.  _ _  h | _ _  Min. bzw.  _ _  h |
| Orthopäde                                | _ _  Min. bzw.  _ _  h | _ _  Min. bzw.  _ _  h | _ _  Min. bzw.  _ _  h |
| Gefäßchirurg                             | _ _  Min. bzw.  _ _  h | _ _  Min. bzw.  _ _  h | _ _  Min. bzw.  _ _  h |
| Radiologe (Röntgenarzt)                  | _ _  Min. bzw.  _ _  h | _ _  Min. bzw.  _ _  h | _ _  Min. bzw.  _ _  h |
| Hals-Nasen-Ohrenarzt                     | _ _  Min. bzw.  _ _  h | _ _  Min. bzw.  _ _  h | _ _  Min. bzw.  _ _  h |
| Augenarzt                                | _ _  Min. bzw.  _ _  h | _ _  Min. bzw.  _ _  h | _ _  Min. bzw.  _ _  h |
| Dermatologe (Hautarzt)                   | _ _  Min. bzw.  _ _  h | _ _  Min. bzw.  _ _  h | _ _  Min. bzw.  _ _  h |
| Neurologe                                | _ _  Min. bzw.  _ _  h | _ _  Min. bzw.  _ _  h | _ _  Min. bzw.  _ _  h |
| Arzt für Psychosomatik                   | _ _  Min. bzw.  _ _  h | _ _  Min. bzw.  _ _  h | _ _  Min. bzw.  _ _  h |
| Psychiater                               | _ _  Min. bzw.  _ _  h | _ _  Min. bzw.  _ _  h | _ _  Min. bzw.  _ _  h |
| Sonstiger Arzt:                          | _ _  Min. bzw.  _ _  h | _ _  Min. bzw.  _ _  h | _ _  Min. bzw.  _ _  h |
| Sonstiger Arzt:                          | _ _  Min. bzw.  _ _  h | _ _  Min. bzw.  _ _  h | _ _  Min. bzw.  _ _  h |
| Ambulante Behandlung<br>im Krankenhaus   | _ _  Min. bzw.  _ _  h | _ _  Min. bzw.  _ _  h | _ _  Min. bzw.  _ _  h |
| Notfallbehandlungen                      | _ _  Min. bzw.  _ _  h | _ _  Min. bzw.  _ _  h | _ _  Min. bzw.  _ _  h |

Probanden-ID: \_\_\_\_\_

**13. Wurden bei Ihnen die folgenden medizinischen Spezialuntersuchungen in den letzten 6 Monaten AMBULANT durchgeführt? Bitte alles Zutreffende ankreuzen!**

☐ Nein

☐ Ja, nämlich:

| Untersuchung                                 | Ja                       | Wie oft:  | Was wurde untersucht: |
|----------------------------------------------|--------------------------|-----------|-----------------------|
| Sonographie<br>(Ultraschalluntersuchung)     | <input type="checkbox"/> | _____ mal |                       |
| Röntgen                                      | <input type="checkbox"/> | _____ mal |                       |
| Spiegelung von Magen oder Darm               | <input type="checkbox"/> | _____ mal |                       |
| Computertomographie (CT)                     | <input type="checkbox"/> | _____ mal |                       |
| Kernspintomographie (MRT)                    | <input type="checkbox"/> | _____ mal |                       |
| EKG                                          | <input type="checkbox"/> | _____ mal |                       |
| Sonstiges ( <i>bitte kurz beschreiben</i> ): | <input type="checkbox"/> | _____ mal |                       |
| Sonstiges ( <i>bitte kurz beschreiben</i> ): | <input type="checkbox"/> | _____ mal |                       |
| Sonstiges ( <i>bitte kurz beschreiben</i> ): | <input type="checkbox"/> | _____ mal |                       |

Probanden-ID: \_\_\_\_\_

**14. Waren Sie in den letzten 6 Monaten in einem Krankenhaus zur STATIONÄREN Behandlung?**

☐ Nein

☐ Ja, nämlich:

| Name und Ort der Einrichtung | Abteilung | Aufnahmegrund bzw. Grund des Aufenthalts | Ist eine Operation durchgeführt worden?                      | Verweildauer              |
|------------------------------|-----------|------------------------------------------|--------------------------------------------------------------|---------------------------|
|                              |           |                                          | <input type="checkbox"/> Ja<br><input type="checkbox"/> Nein | ___Tage oder<br>___Wochen |
|                              |           |                                          | <input type="checkbox"/> Ja<br><input type="checkbox"/> Nein | ___Tage oder<br>___Wochen |
|                              |           |                                          | <input type="checkbox"/> Ja<br><input type="checkbox"/> Nein | ___Tage oder<br>___Wochen |
|                              |           |                                          | <input type="checkbox"/> Ja<br><input type="checkbox"/> Nein | ___Tage oder<br>___Wochen |
|                              |           |                                          | <input type="checkbox"/> Ja<br><input type="checkbox"/> Nein | ___Tage oder<br>___Wochen |

Probanden-ID: \_\_\_\_\_

**15. Haben Sie in den letzten 6 Monaten einen Psychotherapeuten aufgesucht?**

☐ Nein

☐ Ja, nämlich:

| Anzahl Kontakte | Selbstgetragene Kosten in €*<br>(Gesamtsumme) | Gesamter Zeitaufwand in<br>Minuten oder Stunden** |
|-----------------|-----------------------------------------------|---------------------------------------------------|
| _____ mal       | _____ €                                       | ____  Min. oder  ____  h                          |

\* Falls Sie den Betrag nicht genau nennen können, schätzen Sie ihn bitte.

\*\* Falls Sie den Zeitaufwand nicht genau nennen können, schätzen Sie ihn bitte.

**16. Haben Sie in den letzten 6 Monaten einen Krankengymnasten, Heilpraktiker oder andere Therapeuten aufgesucht?**

☐ Nein

☐ Ja, nämlich:

| Therapeut<br>(Fachrichtung)              | Anzahl der<br>Kontakte | Leistungen<br>(bitte kurz beschreiben) | Selbstgetragene<br>Kosten in €*<br>(Gesamtsumme) | Gesamter<br>Zeitaufwand in<br>Minuten oder<br>Stunden** |
|------------------------------------------|------------------------|----------------------------------------|--------------------------------------------------|---------------------------------------------------------|
| Krankengymnast                           | _____ mal              |                                        | _____ €                                          | ____  Min. oder<br> ____  h                             |
| Heilpraktiker                            | _____ mal              |                                        | _____ €                                          | ____  Min. oder<br> ____  h                             |
| Sonstiger Therapeut<br>(bitte benennen): | _____ mal              |                                        | _____ €                                          | ____  Min. oder<br> ____  h                             |
| Sonstiger Therapeut<br>(bitte benennen): | _____ mal              |                                        | _____ €                                          | ____  Min. oder<br> ____  h                             |

\* Falls Sie den Betrag nicht genau nennen können, schätzen Sie ihn bitte.

\*\* Falls Sie den Zeitaufwand nicht genau nennen können, schätzen Sie ihn bitte.

Probanden-ID: \_\_\_\_\_

**17. Haben Sie in den letzten 6 Monaten an Maßnahmen zur Gesundheitsförderung teilgenommen? Gemeint sind z.B. Kurse, Schulungen oder Beratungen, die sich mit Ernährung, Bewegung, Entspannung und Sport oder Fitness befassen.**

☐ Nein

☐ Ja, nämlich:

| Kurze Beschreibung | Selbstgetragene<br>Kosten in €*<br>(Gesamtsumme) | Gesamter Zeitaufwand<br>in Minuten oder<br>Stunden**     |
|--------------------|--------------------------------------------------|----------------------------------------------------------|
|                    | _____ €                                          | <input type="text"/> Min. oder<br><input type="text"/> h |
|                    | _____ €                                          | <input type="text"/> Min. oder<br><input type="text"/> h |
|                    | _____ €                                          | <input type="text"/> Min. oder<br><input type="text"/> h |
|                    | _____ €                                          | <input type="text"/> Min. oder<br><input type="text"/> h |

\* Falls Sie den Betrag nicht genau nennen können, schätzen Sie ihn bitte.

\*\* Falls Sie den Zeitaufwand nicht genau nennen können, schätzen Sie ihn bitte.

**18. Welche Art der Krankenversicherung haben Sie?**

☐ gesetzlich

☐ privat

☐ gesetzlich mit privater Zusatzversicherung

Probanden-ID: \_\_\_\_\_

**19. Nehmen Sie an einem *Disease-Management-Programm (DMP)* teil? Gemeint sind spezielle Programme, die von den Krankenkassen für chronisch kranke Patienten über den Hausarzt/ behandelnden Arzt angeboten werden und in die Sie sich eintragen mussten.**

☐ Ja, nämlich:

☐ DMP für Diabetes

☐ anderes DMP, bitte benennen: \_\_\_\_\_

☐ Nein

☐ Weiß ich nicht

### **Behandlung des Diabetes**

**20. Wie häufig messen Sie gegenwärtig Ihren Blutzucker?**

\_\_\_\_\_ mal pro Tag

\_\_\_\_\_ mal pro Woche

☐ gar nicht

**21. Wie wird Ihr Diabetes gegenwärtig (d.h. in den letzten 2-4 Wochen) behandelt?**

***Mehrere Angaben sind möglich!***

☐ Mit Diät oder Bewegung

☐ Mit blutzuckersenkenden Tabletten

☐ Mit Insulin

☐ Sonstiges (z.B. mit Spritzen von Byetta oder Victoza): \_\_\_\_\_

Probanden-ID: \_\_\_\_\_

*Bitte beantworten Sie die Fragen 22 bis 24 nur wenn Sie mit Insulin behandelt werden.*

**22. Wie häufig spritzen Sie pro Tag Insulin?**

In der Regel \_\_\_\_\_ mal pro Tag

**23. Spritzen Sie Insulin in vom Arzt fest vorgegebener täglicher Menge oder haben Sie mit dem Arzt eine „flexible Therapie“ vereinbart, d.h. Sie bestimmen die Einheiten pro Mahlzeit oder Tageszeit selbständig:**

☐ Insulinmenge ist fest vorgegeben

☐ Insulinmenge wird selbst nach Bedarf bestimmt

**24. Haben Sie die Art der Insulin-Zuführung in den letzten 6 Monaten gewechselt (z.B. Wechsel von Spritze zu Pen oder Pumpe)?**

☐ Nein

☐ Ja, und zwar von \_\_\_\_\_ auf \_\_\_\_\_ ungefähr seit \_\_\_\_\_

**Gesundheit, Beruf und Alltag**

**25. Wie waren Sie in den letzten 6 Monaten beruflich beschäftigt?**

☐ Voll erwerbstätig (mit einer wöchentlichen Arbeitszeit von 35 Stunden und mehr)

☐ Teilzeitbeschäftigt

☐ Arbeitslos

☐ Erwerbsunfähig

☐ Rentner(in), Pensionär(in), im Vorruhestand

☐ Sonstige Tätigkeit: \_\_\_\_\_

**26. Waren Sie in den letzten 6 Monaten krankgeschrieben?**

☐ Nein

☐ Ja, für insgesamt \_\_\_\_\_ Tage

Probanden-ID: \_\_\_\_\_

**27. Gab es in den letzten 4 Wochen Tage, an denen Sie so krank waren, dass Sie Ihren üblichen (Arbeits-)Tätigkeiten nicht nachgehen konnten? Bitte denken Sie an alle Tage, an denen Sie wegen Krankheit nicht zur Arbeit gehen konnten oder Ihren üblichen Tätigkeiten nicht nachgehen konnten, auch wenn Sie nicht ärztlich krankgeschrieben waren. Falls Sie die Zahl nicht wissen, schätzen Sie bitte möglichst genau!**

☐ Nein

☐ Ja, nämlich \_\_\_\_\_ Tage

**28. Haben Sie wegen Ihres Gesundheitszustandes in den letzten 4 Wochen Hilfe für Arbeiten in Anspruch nehmen müssen, die Sie üblicherweise selber erledigen (z.B. um den Haushalt oder Einkäufe zu erledigen)?**

☐ Nein

☐ Ja, nämlich:

| Art der Hilfen                                         | Gesamter Zeitaufwand in Stunden* | Selbstgetragene Kosten**<br>(Gesamtsumme) |
|--------------------------------------------------------|----------------------------------|-------------------------------------------|
| Hilfe von Familienangehörigen, Freunden oder Bekannten | _____ h                          | _____ €                                   |
| Haushaltshilfen                                        | _____ h                          | _____ €                                   |
| Ambulante Pflegedienste (z.B. Caritas)                 | _____ h                          | _____ €                                   |
| Sonstiges, nämlich:<br>_____                           | _____ h                          | _____ €                                   |

\* Falls Sie den Zeitaufwand nicht genau nennen können, schätzen Sie ihn bitte.

\*\* Falls Sie den Betrag nicht genau nennen können, schätzen Sie ihn bitte.

**29. Haben Sie in den letzten 6 Monaten eine Erwerbsunfähigkeitsrente beantragt?**

☐ Nein ☐ Ja

**Falls „Ja“, ist Ihr Rentenanspruch schon bewilligt worden?**

☐ Ja, der Bescheid gilt ab \_\_\_\_\_

☐ Nein

Probanden-ID: \_\_\_\_\_

### **Angaben zu Ihrer Person**

**30. Ihr Geburtsjahr:** \_\_\_\_\_

**31. Ihr Geschlecht:**            Männlich ☐            Weiblich ☐

**32. Welchen Familienstand haben Sie?**

Ledig                    ☐

Verheiratet            ☐

Geschieden           ☐

Verwitwet             ☐

**33. Leben Sie mit einem (Ehe-)Partner/ einer (Ehe-)Partnerin zusammen?**

Ja                    ☐

Nein                ☐

**34. Welche Nationalität haben Sie?**

Deutsch ☐

Andere ☐, nämlich: \_\_\_\_\_

**Falls „andere“, wie lange wohnen Sie schon in Deutschland?**

Seit \_\_\_\_\_ Jahr(en)

**35. Welchen allgemeinbildenden Schulabschluss haben Sie? Bitte geben Sie nur Ihren höchsten Schulabschluss an.**

Noch Schüler .....|☐|

Schule beendet ohne Abschluss .....|☐|

Volks-/ Hauptschulabschluss bzw. Polytechnische Oberschule  
(mit Abschluss der 8. oder 9. Klasse) .....|☐|

Mittlere Reife, Realschulabschluss bzw. Polytechnische Oberschule  
(mit Abschluss der 10. Klasse) .....|☐|

Fachhochschulreife (Abschluss einer Fachoberschule etc.) .....|☐|

Abitur bzw. Erweiterte Oberschule mit Abschluss der 12. Klasse  
(Hochschulreife) .....|☐|

Anderer Schulabschluss und zwar: \_\_\_\_\_ .....|☐|

Probanden-ID: \_\_\_\_\_

**36. Welchen beruflichen Ausbildungsabschluss haben Sie?**

*Mehrere Angaben sind möglich!*

Betriebliche Anlernzeit, aber keine Lehre .....|\_|

Lehre/ Berufsfachschulabschluss .....|\_|

Meister-, Techniker- od. gleichwertiger Fachschulabschluss .....|\_|

Fachhochschulabschluss .....|\_|

Hochschulabschluss .....|\_|

Anderen beruflichen Ausbildungsabschluss, und zwar:

\_\_\_\_\_ .....|\_|

Noch in beruflicher Ausbildung (Auszubildende(r), Lehrling, Berufsfachschule).....|\_|

Student(in) .....|\_|

Keinen beruflichen Ausbildungsabschluss .....|\_|

**37. Welchen Beruf üben Sie aus bzw. haben Sie früher ausgeübt?**

\_\_\_\_\_

**38. Wie viele Personen leben ständig in Ihrem Haushalt?**

☐ Ich lebe alleine.

☐ Ich lebe nicht alleine. Außer mir leben im Haushalt \_\_\_\_\_ weitere Personen.

**39. Wie hoch ist das monatliche Nettoeinkommen Ihres Haushaltes zur Zeit insgesamt? Gemeint ist dabei die Summe, die sich aus Lohn, Gehalt, Einkommen aus selbständiger Tätigkeit, Rente oder Pension ergibt. Rechnen Sie bitte auch die Einkünfte aus öffentlichen Beihilfen, Einkommen aus Vermietung und Verpachtung, Wohngeld, Kindergeld und sonstige Einkünfte hinzu.**

**Ordnen Sie sich bitte in eine der folgenden Kategorien ein:**

unter 1.000 € ☐

1.000 € bis unter 1.500 € ☐

1.500 € bis unter 2.000 € ☐

2.000 € bis unter 2.500 € ☐

2.500 € bis unter 3.000 € ☐

3.000 € bis unter 3.500 € ☐

3.500 € bis unter 4.000 € ☐

4.000 € bis unter 4.500 € ☐

4.500 € bis unter 5.000 € ☐

5.000 € bis unter 6.000 € ☐

6.000 € bis unter 8.000 € ☐

über 8.000 € ☐

Probanden-ID: \_\_\_\_\_

**Wir bedanken uns herzlich für Ihre Mitarbeit und bitten Sie um eine kurze Bewertung des Fragebogens**

**War der Fragebogen einfach oder schwierig auszufüllen? Bitte kreuzen Sie die Skala entsprechend an:**

Einfach auszufüllen ←—————→ Schwierig auszufüllen

☐  
1

☐  
2

☐  
3

☐  
4

☐  
5

☐  
6

**Wie beurteilen Sie die Länge des Fragebogens? Bitte kreuzen Sie wieder die Skala entsprechend an:**

In Ordnung ←—————→ Viel zu lang

☐  
1

☐  
2

☐  
3

☐  
4

☐  
5

☐  
6

**Wie viel Zeit haben Sie zum Ausfüllen des Fragebogens gebraucht?**

\_\_\_\_\_ Minuten

**Haben Sie noch Anmerkungen zum Fragebogen?**

---

---

---

---

*Herzlichen Dank!*
